# Supplementary material for: MEK1/2 regulate normal BCR and ABL1 tumor-suppressor functions to dictate ATO response in TKI-resistant Ph+ leukemia
Source: Springer Nature journal article supplement (doi:10.1038/s41375-023-01940-x), 2023-06-29
Supplement: MOESM4 [file 41375_2023_1940_MOESM4_ESM.pdf]

**Supplemental Table 3:** List of antibodies used in this study

| <b>ANTIBODIES FOR WESTERN BLOT</b>                        | <b>SOURCE and #catalogue</b>       |
|-----------------------------------------------------------|------------------------------------|
| Rabbit polyclonal anti-phospho-p44/42 ERK (Thr202/Tyr204) | Cell Signaling Technology #9101    |
| Rabbit polyclonal anti p44/p42 ERK                        | Cell Signaling Technology #9102    |
| Rabbit monoclonal anti Phospho MEK1/2 (Ser217/221)        | Cell Signaling Technology #9154    |
| Rabbit polyclonal anti MEK1/2                             | Cell Signaling Technology #9122    |
| Mouse monoclonal anti MEK1/2 (L38C12)                     | Cell Signaling Technology #4694    |
| Mouse monoclonal anti c-Abl (24-11)                       | Santa Cruz Biotechnology sc-23     |
| Rabbit polyclonal anti phospho-c-Abl (Tyr245)             | Cell Signaling Technology #2861    |
| Rabbit monoclonal anti phospho-c-Abl (Tyr412) (247C7)     | Cell Signaling Technology #2865    |
| Rabbit polyclonal anti phospho-c-Abl (Thr735)             | Cell Signaling Technology #2864    |
| Rabbit polyclonal anti Phospho-CrkL (Tyr207)              | Cell Signaling Technology #3181    |
| Mouse monoclonal anti Crk-L (B-1)                         | Santa Cruz Biotechnology sc-365092 |
| Rabbit polyclonal anti Bcr                                | Cell Signaling Technology #3902    |
| Rabbit polyclonal phospho-Bcr (Tyr360)                    | Invitrogen PA5-104787              |
| Rabbit polyclonal anti Phospho-Bcr (Tyr177)               | Cell Signaling Technology #3901    |
| Mouse monoclonal anti Myc/c-Myc                           | Santa Cruz Biotechnology sc-40     |
| Mouse monoclonal anti TAp73 $\alpha$ + $\beta$            | Imgenex IMG-259                    |
| Mouse monoclonal anti $\Delta$ Np73                       | Imgenex IMG-313                    |
| Rabbit polyclonal anti Acetyl-TP73 (Lys321)               | St John's Laboratory STJ90152      |
| Rabbit polyclonal anti phospho-p73 (Tyr99)                | Cell Signaling Technology #4665    |
| Rabbit polyclonal anti p53AIP1                            | AnaSpec 28013                      |
| Rabbit polyclonal anti Bax                                | Cell Signaling Technology #2772    |
| Rabbit polyclonal anti Bak                                | Cell Signaling Technology #3792    |
| Rabbit polyclonal anti PUMA                               | Cell Signaling Technology #4976    |
| Rabbit monoclonal anti NOXA                               | Cell Signaling Technology #14766   |
| Rabbit polyclonal anti Bim (C34C5)                        | Cell Signaling Technology #2933    |
| Rabbit polyclonal anti cleaved caspase-3 (Asp175)         | Cell Signaling Technology #9661    |
| Mouse monoclonal anti $\beta$ Tubulin (D-10)              | Santa Cruz Biotechnology sc-5274   |
| Mouse monoclonal anti PARP (F12)                          | Santa Cruz Biotechnology sc-8007   |
| Mouse monoclonal anti Lamin A/C (4C11)                    | Cell Signaling Technology #4777    |
| Goat polyclonal anti actin (I-19)                         | Santa Cruz Biotechnology sc-1616   |
| Donkey anti goat IgG HRP conjugated                       | Santa Cruz Biotechnology sc-2020   |
| Goat anti rabbit IgG (H+L)-HRP conjugated                 | Bio-Rad #1706515                   |
| Goat anti mouse IgG (H+L)-HRP conjugated                  | Bio-Rad #1706516                   |
| <b>ANTIBODIES FOR IMMUNOPRECIPITATION</b>                 | <b>SOURCE and #catalogue</b>       |
| Rabbit polyclonal anti MEK1/2                             | Cell Signaling Technology #9122    |
| Mouse monoclonal anti c-Abl (24-11)                       | Santa Cruz Biotechnology sc-23     |
| Rabbit polyclonal anti Bcr (N-20)                         | Santa Cruz Biotechnology sc-885    |
| Mouse monoclonal anti Bcr (7C6)                           | Santa Cruz Biotechnology sc-103    |
| <b>ANTIBODIES FOR IMMUNOISTOCHEMISTRY</b>                 | <b>SOURCE and #catalogue</b>       |
| Mouse Monoclonal anti Ki-67                               | Novo Castra NCL-L-Ki67-MM1         |
| Rabbit monoclonal anti Cleaved caspase-3 (Asp175)         | Cell Signaling Technology #9579    |
| Biotinylated goat anti mouse antibody                     | Vector Laboratories BA-9200        |
| Biotinylated goat anti rabbit antibody                    | Vector Laboratories BA-1000        |
| <b>ANTIBODIES FOR IMMUNOCYTOCHEMISTRY</b>                 | <b>SOURCE and #catalogue</b>       |
| Mouse monoclonal anti c-Abl (8E9)                         | Santa Cruz Biotechnology sc-56887  |
| Goat anti-mouse IgG (H+L) Alexa Fluor 594                 | Invitrogen A-11032                 |
